# Supplementary material for: Changes in Heart Rate Associated with Exenatide Once Weekly: Pooled Analysis of Clinical Data in Patients with Type 2 Diabetes
Source: PubMed Central journal article supplement (PMC6104267; doi:10.1007/s13300-018-0370-z), 2018-02-03

## SUPPLEMENTARY MATERIAL

**Table S1** Summary of studies

| Study                         | ITT, <i>N</i> | Randomized duration, weeks | Posttreatment follow-up, <sup>a</sup> Y/N | Treatment                                                                                                     | Background diabetes treatment                      | Study visits, weeks                                     |
|-------------------------------|---------------|----------------------------|-------------------------------------------|---------------------------------------------------------------------------------------------------------------|----------------------------------------------------|---------------------------------------------------------|
| Kim et al. <sup>b</sup>       | 45            | 15                         | N                                         | Exenatide QW 0.8 or 2.0 mg ( <i>n</i> = 16, 15)<br>Placebo ( <i>n</i> = 14)                                   | MET                                                | 1, 2, 3, 4, 5, 6, 7,<br>8, 9, 10, 11, 12,<br>13, 14, 15 |
| Drucker et al. (DURATION-1)   | 295           | 30                         | N                                         | Exenatide QW 2.0 mg ( <i>n</i> = 148)<br>Exenatide BID 5 µg (4 wk)→<br>10 µg ( <i>n</i> = 147)                | MET/SU/TZD or any combination of 2 of these agents | 1, 2, 3, 4, 6, 10,<br>14, 18, 22, 26, 30                |
| Davies et al.                 | 216           | 26                         | N                                         | Exenatide QW 2.0 mg ( <i>n</i> = 111)<br>Insulin detemir QD or BID ( <i>n</i> = 105)                          | MET/MET+SU                                         | 4, 8, 12, 18, 26                                        |
| Iwamoto et al. <sup>b</sup>   | 29            | 10                         | N                                         | Exenatide QW 0.8 mg ( <i>n</i> = 10)<br>Exenatide QW 2.0 mg ( <i>n</i> = 9)<br>Placebo ( <i>n</i> = 10)       | BG/SU/TZD/BG+SU/<br>BG+TZD/SU+TZD                  | 1, 2, 3, 4, 5, 6, 7,<br>8, 9, 10                        |
| Bergental et al. (DURATION-2) | 491           | 26                         | N                                         | Exenatide QW 2.0 mg ( <i>n</i> = 160)<br>SITA 100 mg/day ( <i>n</i> = 166)<br>PIO 45 mg/day ( <i>n</i> = 165) | MET                                                | 1, 2, 4, 6, 10, 14,<br>18, 22, 26                       |
| Diamant et al. (DURATION-3)   | 456           | 26                         | N                                         | Exenatide QW 2.0 mg ( <i>n</i> = 233)                                                                         | MET/MET+SU                                         | 1, 2, 4, 8, 14, 18,<br>22, 26                           |

| Study                                | ITT, <i>N</i> | Randomized duration, weeks | Posttreatment follow-up, <sup>a</sup> Y/N | Treatment                                                                                                                                                                                               | Background diabetes treatment                            | Study visits, weeks            |
|--------------------------------------|---------------|----------------------------|-------------------------------------------|---------------------------------------------------------------------------------------------------------------------------------------------------------------------------------------------------------|----------------------------------------------------------|--------------------------------|
| Inagaki et al.                       | 427           | 26                         | N                                         | Insulin glargine 10 IU/d adjusted to achieve target glucose of 4.0–5.5 mmol/L ( <i>n</i> = 223)<br>Exenatide QW 2.0 mg ( <i>n</i> = 215)                                                                | BG alone/BG+TZD/<br>BG+SU/BG+TZD+SU                      | 1, 2, 4, 8, 12, 20, 26         |
| Blevins et al.<br>(DURATION-5)       | 252           | 24                         | N                                         | Insulin glargine 4 U adjusted to achieve FBG <5.5 mmol/L ( <i>n</i> = 212)<br>Exenatide QW 2.0 mg ( <i>n</i> = 129)                                                                                     | Drug-naïve/MET/SU/TZD or any combination of these agents | 1, 4, 8, 14, 20, 24            |
| Russell-Jones et al.<br>(DURATION-4) | 820           | 26                         | Y <sup>a</sup>                            | Exenatide BID 5 µg (4 wk)→10 µg ( <i>n</i> = 123)<br>Exenatide QW 2.0 mg ( <i>n</i> = 248)<br>MET 2000 mg/day ( <i>n</i> = 246)<br>PIO 45 mg/day ( <i>n</i> = 163)<br>SITA 100 mg/day ( <i>n</i> = 163) | Drug-naïve                                               | 1, 2, 4, 8, 12, 16, 20, 26, 36 |
| Buse et al.<br>(DURATION-6)          | 911           | 26                         | Y <sup>a</sup>                            | Exenatide QW 2.0 mg ( <i>n</i> = 461)<br>Liraglutide QD 1.8 mg ( <i>n</i> = 450)                                                                                                                        | MET/SU/MET+SU/MET+PIO                                    | 1, 2, 4, 8, 14, 18, 22, 26, 36 |
| Ji et al.                            | 678           | 26                         | Y <sup>a,c</sup>                          | Exenatide QW 2.0 mg ( <i>n</i> = 340)<br>Exenatide BID 5 µg (4 wk)→                                                                                                                                     | MET/SU/TZD/MET+SU/<br>MET+TZD/SU+TZD                     |                                |

| <b>Study</b> | <b>ITT, N</b> | <b>Randomized duration, weeks</b> | <b>Posttreatment follow-up,<sup>a</sup> Y/N</b> | <b>Treatment</b> | <b>Background diabetes treatment</b> | <b>Study visits, weeks</b> |
|--------------|---------------|-----------------------------------|-------------------------------------------------|------------------|--------------------------------------|----------------------------|
|              |               |                                   |                                                 | 10 µg (n = 338)  |                                      |                            |

*BID* twice daily, *BG* biguanide, *FBG* fasting blood glucose, *ITT* intention-to-treat, *MET* metformin, *PIO* pioglitazone, *SITA* sitagliptin, *SU* sulfonylurea, *TZD*

thiazolidinedione, *QD* once daily, *QW* once weekly, *wk* week

<sup>a</sup> Included 10-week off-treatment follow-up period

<sup>b</sup> Not included in multivariate analysis

<sup>c</sup> Excluded Japanese sites where patients continued through the extension treatment period



|                    | <b>Exenatide<br/>QW<br/>(n = 2096)</b> | <b>Exenatide<br/>BID<br/>(n = 606)</b> | <b>Liraglutide<br/>(n = 450)</b> | <b>Sitagliptin<br/>(n = 329)</b> | <b>Pioglitazone<br/>(n = 328)</b> | <b>Insulin<br/>(n = 540)</b> | <b>Metformin<br/>(n = 246)</b> | <b>Placebo<br/>(n = 23)</b> |
|--------------------|----------------------------------------|----------------------------------------|----------------------------------|----------------------------------|-----------------------------------|------------------------------|--------------------------------|-----------------------------|
| therapy            |                                        |                                        |                                  |                                  |                                   |                              |                                |                             |
| Diet and exercise  | 314 (15.0)                             | 46 (7.6)                               | 7 (1.6)                          | 154 (46.8)                       | 159 (48.5)                        | 1 (0.2)                      | 233 (94.7)                     | 6 (26.1)                    |
| Insulin            | 1 (<0.1)                               | 0 (0.0)                                | 0 (0.0)                          | 0 (0.0)                          | 1 (0.3)                           | 0 (0.0)                      | 3 (1.2)                        | 0 (0.0)                     |
| MET                | 833 (39.7)                             | 159 (26.2)                             | 129 (28.7)                       | 169 (51.4)                       | 161 (49.1)                        | 326 (60.4)                   | 8 (3.3)                        | 10 (43.5)                   |
| MET + insulin      | 2 (<0.1)                               | 4 (0.7)                                | 0 (0.0)                          | 2 (0.6)                          | 4 (1.2)                           | 1 (0.2)                      | 0 (0.0)                        | 0 (0.0)                     |
| MET + other        | 3 (0.1)                                | 1 (0.2)                                | 1 (0.2)                          | 1 (0.3)                          | 0 (0.0)                           | 0 (0.0)                      | 2 (0.8)                        | 0 (0.0)                     |
| MET + SU           | 700 (33.4)                             | 273 (45.0)                             | 271 (60.2)                       | 0 (0.0)                          | 1 (0.3)                           | 140 (25.9)                   | 0 (0.0)                        | 2 (8.7)                     |
| MET + SU + insulin | 4 (0.2)                                | 1 (0.2)                                | 2 (0.4)                          | 0 (0.0)                          | 0 (0.0)                           | 1 (0.2)                      | 0 (0.0)                        | 0 (0.0)                     |
| MET + SU + other   | 4 (0.2)                                | 2 (0.3)                                | 0 (0.0)                          | 0 (0.0)                          | 0 (0.0)                           | 0 (0.0)                      | 0 (0.0)                        | 0 (0.0)                     |
| MET + SU + TZD     | 16 (0.8)                               | 12 (2.0)                               | 1 (0.2)                          | 1 (0.3)                          | 0 (0.0)                           | 0 (0.0)                      | 0 (0.0)                        | 0 (0.0)                     |
| MET + TZD          | 124 (5.9)                              | 32 (5.3)                               | 21 (4.7)                         | 0 (0.0)                          | 0 (0.0)                           | 69 (12.8)                    | 0 (0.0)                        | 0 (0.0)                     |
| Other              | 0 (0.0)                                | 0 (0.0)                                | 0 (0.0)                          | 2 (0.6)                          | 0 (0.0)                           | 1 (0.2)                      | 0 (0.0)                        | 0 (0.0)                     |
| SU                 | 61 (2.9)                               | 48 (7.9)                               | 17 (3.8)                         | 0 (0.0)                          | 1 (0.3)                           | 0 (0.0)                      | 0 (0.0)                        | 3 (13.0)                    |
| SU + other         | 2 (<0.1)                               | 0 (0.0)                                | 0 (0.0)                          | 0 (0.0)                          | 0 (0.0)                           | 0 (0.0)                      | 0 (0.0)                        | 0 (0.0)                     |
| SU + TZD           | 20 (1.0)                               | 17 (2.8)                               | 1 (0.2)                          | 0 (0.0)                          | 0 (0.0)                           | 0 (0.0)                      | 0 (0.0)                        | 1 (4.3)                     |
| SU + TZD + insulin | 1 (<0.1)                               | 0 (0.0)                                | 0 (0.0)                          | 0 (0.0)                          | 0 (0.0)                           | 0 (0.0)                      | 0 (0.0)                        | 0 (0.0)                     |
| TZD                | 10 (0.5)                               | 11 (1.8)                               | 0 (0.0)                          | 0 (0.0)                          | 1 (0.3)                           | 0 (0.0)                      | 0 (0.0)                        | 1 (4.3)                     |
| TZD + other        | 1 (<0.1)                               | 0 (0.0)                                | 0 (0.0)                          | 0 (0.0)                          | 0 (0.0)                           | 1 (0.2)                      | 0 (0.0)                        | 0 (0.0)                     |

Data are presented as *n* (%) or mean ± standard deviation

*BID* twice daily, *BP* blood pressure, *bpm* beats per minute, *HbA1c* glycated hemoglobin, *MET* metformin, *QW* once weekly, *RA* renin–angiotensin, *SU* sulfonylurea, *T2DM* type 2 diabetes mellitus, *TZD* thiazolidinedione

**Fig. S1 (a)** Mean  $\pm$  SE HR over time and **(b)** LS mean  $\pm$  SE HR change from BL to final on-treatment measurement by treatment. *BID* twice daily, *BL* baseline, *bpm* beats per minute, *EOT* end of treatment, *HR* heart rate, *LS* least-squares, *QW* once weekly, *SE* standard error

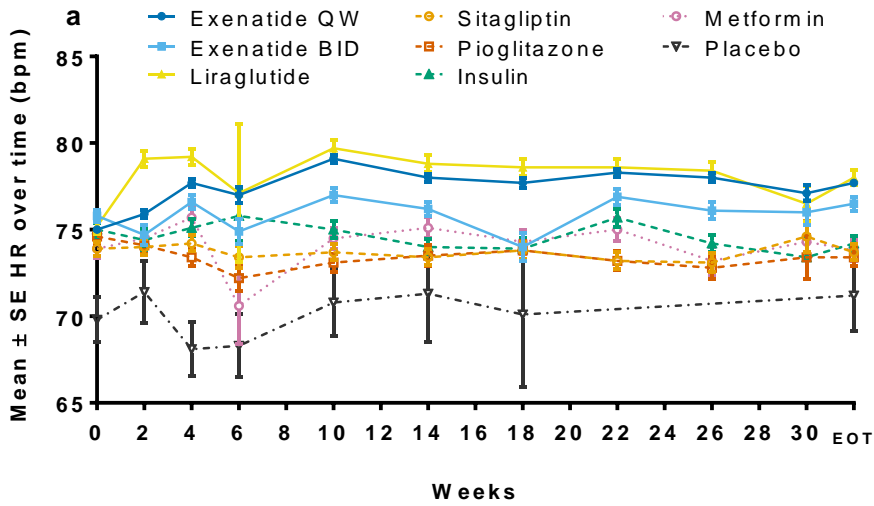

| Week             | 0    | 2    | 4    | 6   | 10   | 14   | 18   | 22   | 26   | 30  | EOT  |
|------------------|------|------|------|-----|------|------|------|------|------|-----|------|
| Exenatide QW, n  | 2096 | 1433 | 1985 | 424 | 1979 | 1837 | 1193 | 1644 | 1570 | 445 | 2087 |
| Exenatide BID, n | 606  | 271  | 564  | 160 | 543  | 524  | 149  | 490  | 424  | 193 | 599  |
| Liraglutide, n   | 450  | 448  | 426  | 8   | 419  | 365  | 369  | 374  | 366  | 73  | 449  |
| Sitagliptin, n   | 329  | 325  | 315  | 160 | 310  | 296  | 286  | 275  | 227  | 77  | 325  |
| Pioglitazone, n  | 328  | 327  | 308  | 158 | 298  | 283  | 268  | 258  | 226  | 52  | 328  |
| Insulin, n       | 540  | 223  | 504  | 29  | 518  | 483  | 286  | 401  | 443  | 95  | 538  |
| Metformin, n     | 246  | 246  | 233  | 9   | 232  | 223  | 210  | 212  | 154  | 77  | 246  |
| Placebo, n       | 23   | 23   | 23   | 23  | 23   | 12   | 7    | 0    | 0    | 0   | 23   |

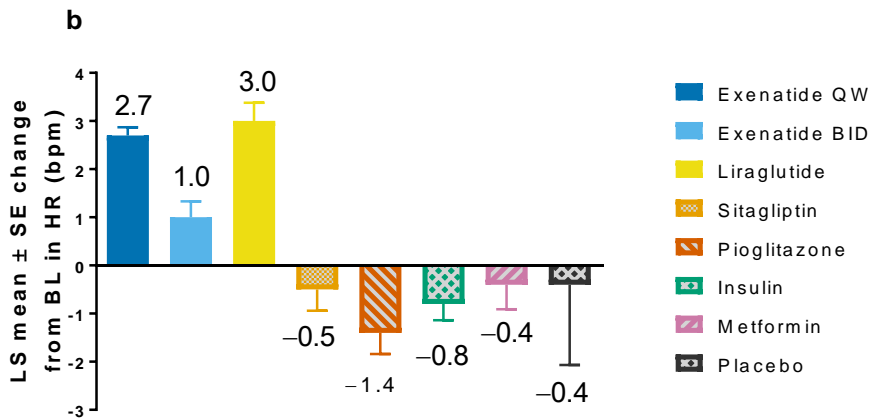

**Fig. S2** Regression for change in HR at treatment end versus baseline HR by treatment. *BID* twice daily, *bpm* beats per minute, *HR* heart rate, *QW* once weekly

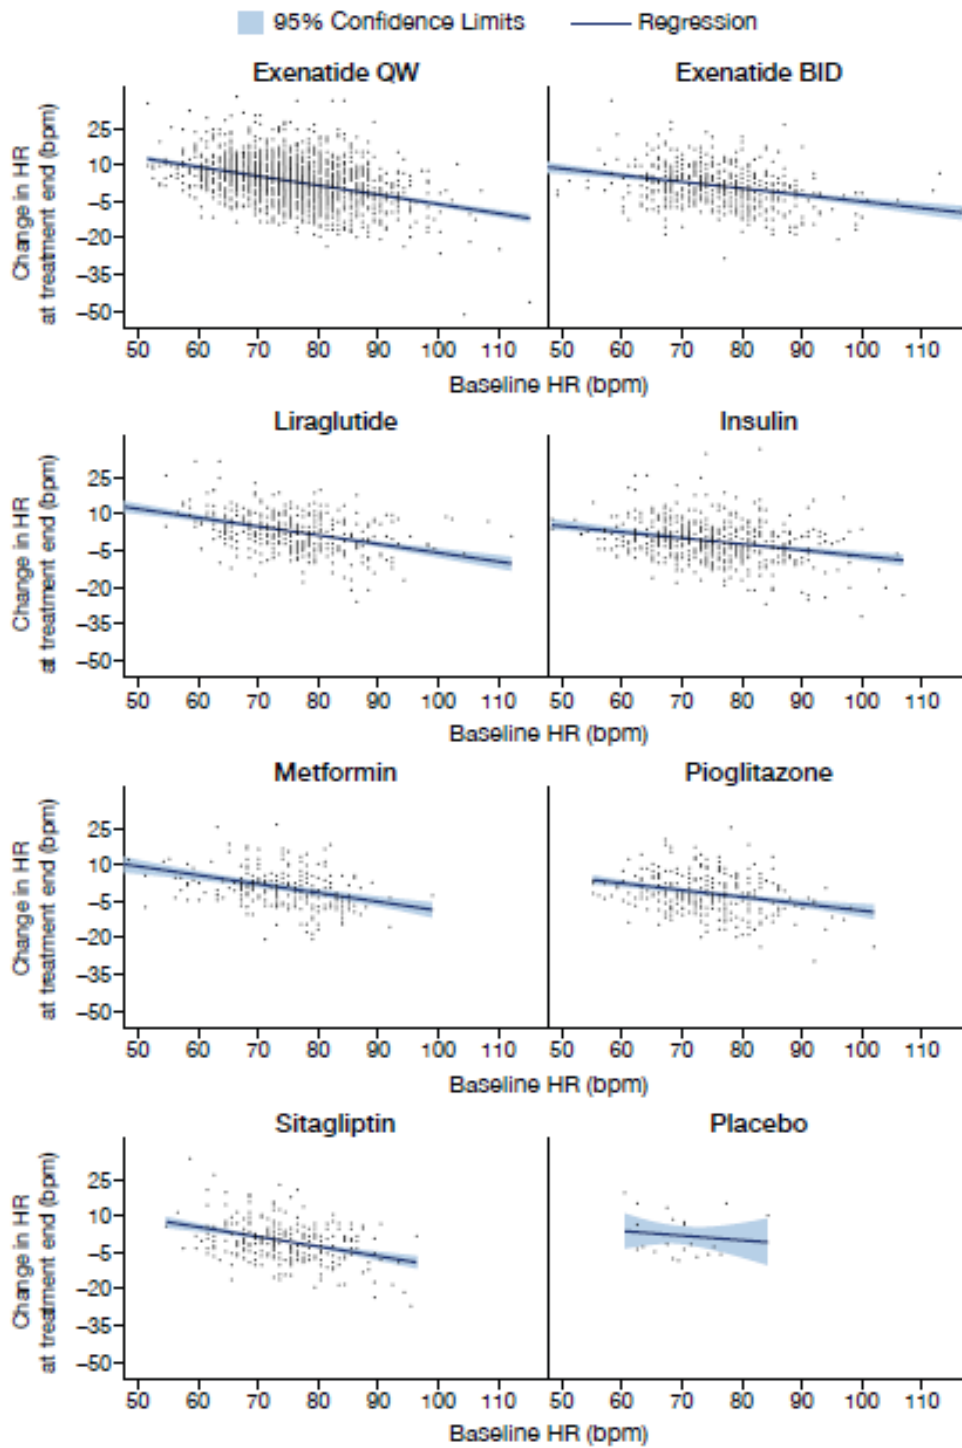

Supplement: 13300_2018_370_MOESM1_ESM.pdf [file 13300_2018_370_MOESM1_ESM.pdf]
